# Supplementary material
Source: MDPI journal article supplement (https://www.mdpi.com/2073-4360/7/11/1511)

# Supplementary Materials

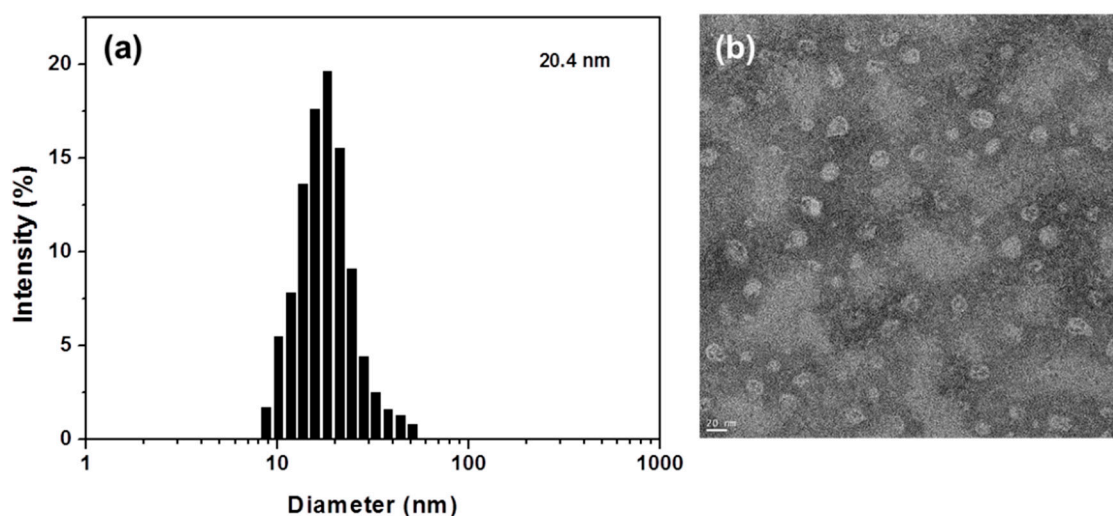

**Figure S1.** (a) Dynamic light scattering (DLS) diagram of DOX-loaded micelles; and (b) transmission electron microscopy (TEM) image negatively stained with phosphotungstic acid hydrate (scale bar, 20 nm).

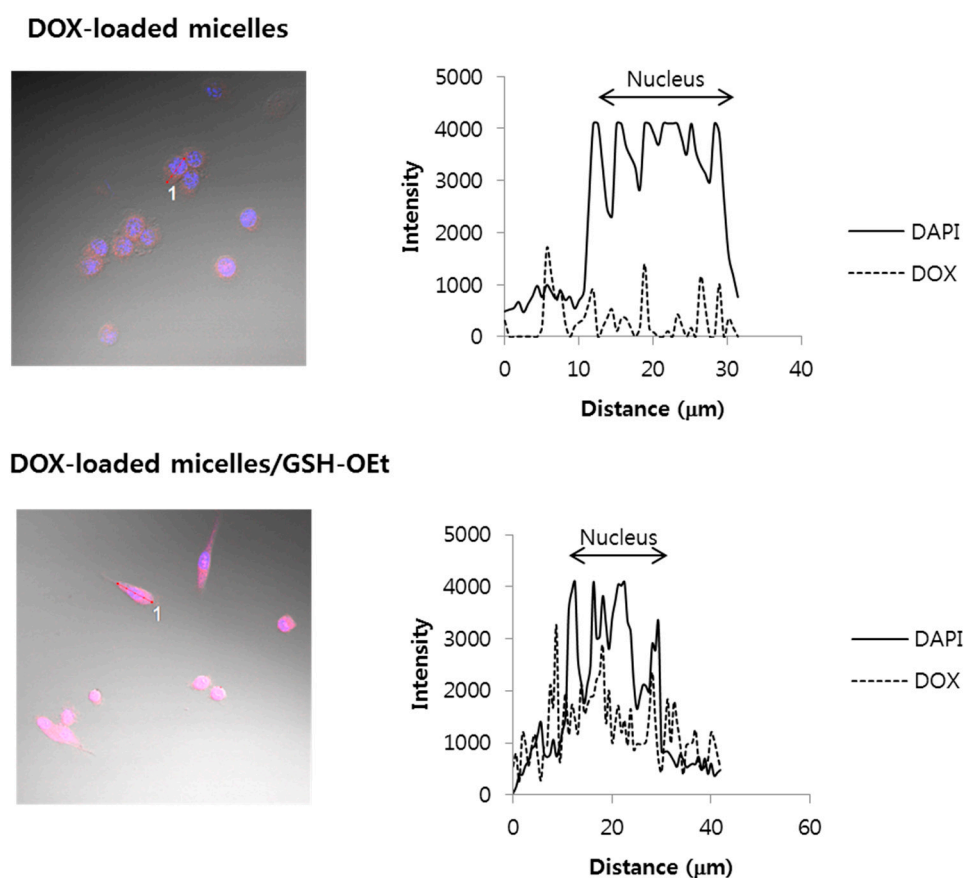

**Figure S2.** Intensity profiles by DAPI and DOX. DAPI and DOX were distributed differently in the nucleus and by GSH-OEt treatment.

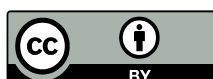

Supplement: s1 [file s1]
